# Supplementary material for: Forensic electrochemical presumptive blood test based on the voltammetric behaviour of methylene blue and whole blood
Source: Royal Society of Chemistry journal article supplement (doi:10.1039/d1ay01358k), 2021-01-01
Supplement: d1ay01358k1.pdf [file d1ay01358k1.pdf]

Supplementary Material

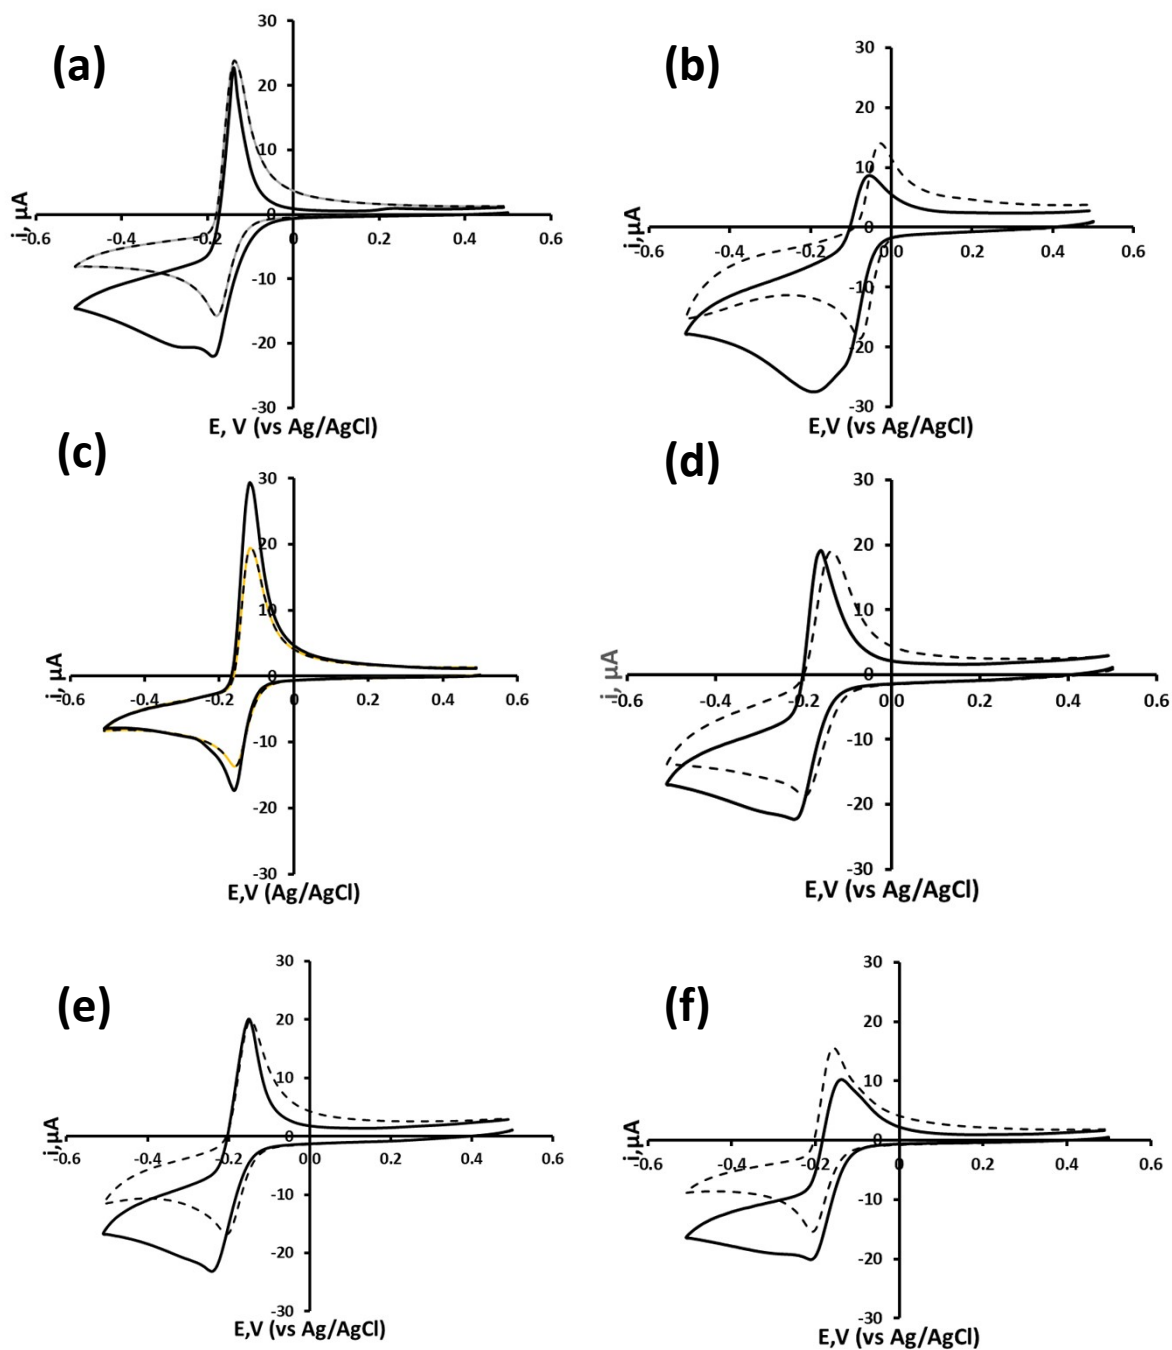

**Figure s1.** Effect of (a) 1 % Virkon<sup>®</sup>, (b) lemon juice, (c) Shiraz red wine, (d) tomato juice, (e) red onion juice, (f) horseradish sauce. Dashed line: methylene blue with possible interferent; solid line: methylene blue with possible interferent in the presence of whole blood.
